# Supplementary material for: Mechanisms of Epithelial-Mesenchymal Transition and Prevention of Dispase-Induced PVR by Delivery of an Antioxidant αB Crystallin Peptide
Source: MDPI journal article supplement (doi:10.3390/antiox11102080), 2022-10-21
Supplement: s1 [file s1]

**Figure. S1. Mitochondrial bioenergetics with TGF $\beta$ 2 treatment of RPE cells**

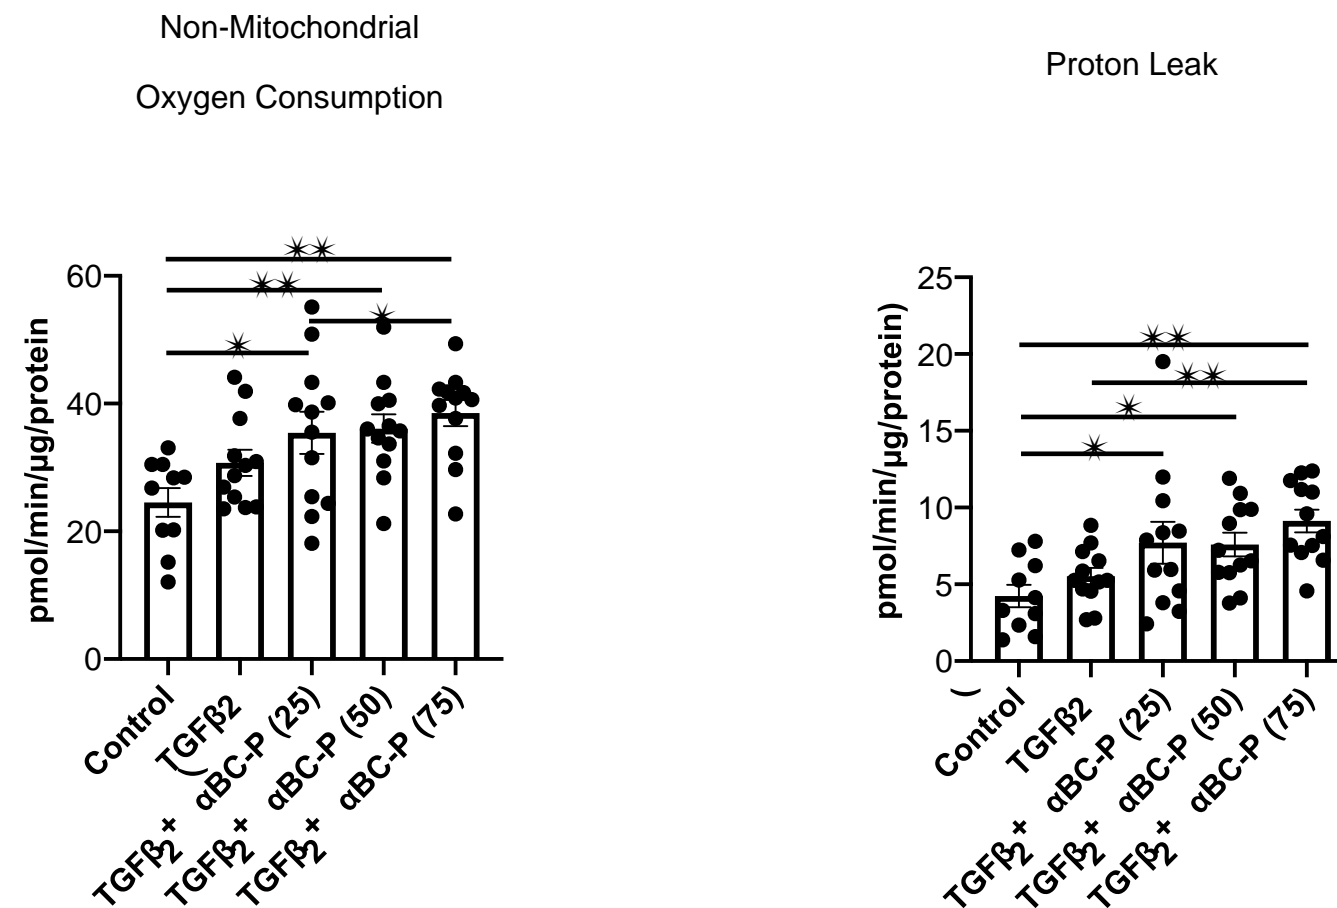

Mitochondrial bioenergetics were analyzed using Seahorse XFe96. Sub-confluent RPE cells were treated with TGF $\beta$ 2 (10 ng/ml) alone or/with  $\alpha$ BC-P (25, 50, and 75  $\mu$ g/ml) in DMEM containing 3% FBS for 48 hours. TGF $\beta$ 2-cotreated with  $\alpha$ BC-P significantly increased non-mitochondrial oxygen consumption and proton leak, compared with the TGF $\beta$ 2-treated group in a dose-dependent manner.  $\alpha$ BC-P:  $\alpha$ B crystallin peptide. Data normalized by  $\mu$ g/cellular protein. Values are means  $\pm$  SEM. \* $P$  < 0.05, \*\* $P$  < 0.01. n=9-15.
